# Supplementary material for: Composite ab initio vibrational spectroscopy and thermochemistry of low-valency lanthanide compounds: europium dihalides EuX2 (X = F, Cl, Br, I)
Source: Royal Society of Chemistry journal article supplement (doi:10.1039/d4cp02507e), 2024-01-01
Supplement: d4cp02507e2.pdf [file d4cp02507e2.pdf]

## Supplementary Information for:

Composite ab initio vibrational spectroscopy and thermochemistry of low-valency lanthanide compounds: europium dihalides  $\text{EuX}_2$  ( $\text{X} = \text{F}, \text{Cl}, \text{Br}, \text{I}$ )

**Alexander N. Smirnov and Victor G. Solomonik**

*Ivanovo State University of Chemistry and Technology, Ivanovo 153000, Russia*

Includes 16 tables and 1 Figure providing:

- anharmonic corrections to vibrational frequencies of  $\text{EuX}_2$  at the MP2 and CCSD(T) levels of theory
- infrared intensities of  $\text{EuX}_2$
- gas-phase extrapolations of the stretching fundamentals of matrix-isolated  $\text{EuF}_2$  and  $\text{EuCl}_2$
- calculated and experimental isotopic shifts in bond stretching vibrational frequencies of  $\text{EuCl}_2$  and  $\text{EuBr}_2$
- the ground state second-order spin-orbit splittings in  $\text{EuX}_2$  and  $\text{EuX}$
- force constants of  $\text{EuX}$  and  $\text{EuX}_2$  in natural (valence) coordinates
- thermal functions in the 298.15–1600 K temperature range for the gaseous  $\text{EuX}_2$  species ( $\text{X} = \text{F}, \text{Cl}, \text{Br}, \text{I}$ ) obtained using the geometries and vibrational frequencies calculated at the CCSD(T)/CBS level of theory. Statistical weight = 8, symmetry number = 2.
- thermal functions in the 298.15–1600 K temperature range for the gaseous  $\text{EuX}$  species ( $\text{X} = \text{F}, \text{Cl}, \text{Br}, \text{I}$ ) obtained using the bond length and vibrational frequencies calculated at the CCSD(T)/CBS level of theory. Statistical weight = 9, symmetry number = 1.

Units in Tables S7–S14 are as follows:

$\mathbf{C}_p$ ,  $\mathbf{S}$ ,  $\Phi = \mathbf{S}(\text{T}) - [\mathbf{H}(\text{T}) - \mathbf{H}(0)]/\text{T}$ ,  $\mathbf{G} = \mathbf{S}(\text{T}) - [(\mathbf{H}(\text{T}) - \mathbf{H}(298))]/\text{T} - \text{cal}/(\text{mol} \cdot \text{K})$ ;  $\mathbf{H}(\text{T}) - \mathbf{H}(0) - \text{cal}/\text{mol}$ .

- pseudopotential-based results for bond lengths, bond angles, barriers to linearity, bond length differences between the linear and bent geometries, harmonic vibrational frequencies, and atomization energies of europium dihalides  $\text{EuX}_2$ , as determined at the MP2 and CCSD(T) levels of theory
- correlation between bond dissociation ( $\text{EuX}$ ) or bond cleavage ( $\text{EuX}_2$ ) energies and bond-stretching force constants in  $\text{EuX}$  and  $\text{EuX}_2$

**Table S1** MP2/LPP and CCSD(T)/LPP calculated anharmonic corrections to the vibrational frequencies of  $\text{EuX}_2$ ,  $\text{cm}^{-1}$ 

|                   |         | $\Delta\nu_1$ | $\Delta\nu_2$ | $\Delta\nu_3$ |
|-------------------|---------|---------------|---------------|---------------|
| EuF <sub>2</sub>  | MP2     | -3.9          | -1.3          | -3.9          |
|                   | CCSD(T) | -3.9          | -1.5          | -3.7          |
| EuCl <sub>2</sub> | MP2     | -1.8          | -0.5          | -1.7          |
|                   | CCSD(T) | -1.8          | -0.6          | -1.7          |
| EuBr <sub>2</sub> | MP2     | -1.0          | 0.0           | -0.8          |
|                   | CCSD(T) | -1.1          | 0.0           | -0.8          |
| EuI <sub>2</sub>  | MP2     | -0.9          | 0.5           | -0.5          |
|                   | CCSD(T) | -0.9          | 0.5           | -0.4          |

**Table S2** Infrared intensities  $A_i$  (km/mol) of the harmonic and fundamental (in *italic*) vibrational transitions in  $\text{EuX}_2$ 

| Level             |            | $A_1$       | $A_2$       | $A_3$        |
|-------------------|------------|-------------|-------------|--------------|
| EuF <sub>2</sub>  | MP2/LPP    | 48.8        | 36.2        | 222.1        |
|                   |            | <i>51.5</i> | <i>48.6</i> | <i>217.0</i> |
|                   | HF/QZ      | 69.0        | 31.2        | 211.3        |
|                   | CCSD(T)/TZ | 63.0        | 23.5        | 208.9        |
| EuCl <sub>2</sub> | MP2/LPP    | 11.9        | 24.7        | 130.4        |
|                   |            | <i>12.3</i> | <i>38.0</i> | <i>127.2</i> |
|                   | HF/QZ      | 18.7        | 21.2        | 121.7        |
|                   | CCSD(T)/TZ | 16.4        | 17.6        | 119.6        |
| EuBr <sub>2</sub> | MP2/LPP    | 5.5         | 14.3        | 78.2         |
|                   |            | <i>5.7</i>  | <i>22.5</i> | <i>75.1</i>  |
|                   | HF/QZ      | 9.6         | 11.7        | 71.4         |
|                   | CCSD(T)/TZ | 8.2         | 9.7         | 70.4         |
| EuI <sub>2</sub>  | MP2/LPP    | 2.3         | 11.6        | 63.0         |
|                   |            | <i>2.2</i>  | <i>18.1</i> | <i>59.1</i>  |
|                   | HF/QZ      | 5.6         | 9.0         | 56.2         |
|                   | CCSD(T)/TZ | 4.7         | 7.5         | 55.8         |

**Table S3** Gas-phase extrapolations of the stretching fundamentals of matrix-isolated  $\text{EuF}_2$  and  $\text{EuCl}_2$  (see also Table 3 of the main text)

|                                                                                 | EuF <sub>2</sub> |         | EuCl <sub>2</sub> |         |
|---------------------------------------------------------------------------------|------------------|---------|-------------------|---------|
|                                                                                 | $\nu_1$          | $\nu_3$ | $\nu_1$           | $\nu_3$ |
| Two-point (Ne–Ar) linear extrapolation to zero polarizability <sup>a</sup>      | 479              | 457     | 278               | 289     |
| Three-point (Ne–Ar–Kr) linear extrapolation to zero polarizability <sup>a</sup> |                  |         | 279               | 291     |

<sup>a</sup> Ne, Ar, and Kr polarizabilities, 0.394, 1.641 and 2.484 Å<sup>3</sup>, respectively, are taken from E. John R. Rumble, CRC Handbook of Chemistry and Physics, 99<sup>th</sup> Edition, CRC Press/Taylor & Francis, 2018 (Internet Version 2018).

**Table S4** Theoretical and experimental isotopic shifts,  $\text{cm}^{-1}$ , in bond stretching vibrational frequencies of  $\text{EuCl}_2$  and  $\text{EuBr}_2$  relative to  $^{37}\text{Cl}-^{37}\text{Cl}$  and  $^{81}\text{Br}-^{81}\text{Br}$ , respectively

|                                 | $\text{EuCl}_2$                 |                                 | $\text{EuBr}_2$                 |                                 |
|---------------------------------|---------------------------------|---------------------------------|---------------------------------|---------------------------------|
|                                 | $^{35}\text{Cl}-^{35}\text{Cl}$ | $^{35}\text{Cl}-^{37}\text{Cl}$ | $^{79}\text{Br}-^{79}\text{Br}$ | $^{79}\text{Br}-^{81}\text{Br}$ |
| $\Delta\omega_1(\text{theory})$ | 7.07                            | 2.63                            | 1.91                            | 1.41                            |
| $\Delta\omega_3(\text{theory})$ | 5.83                            | 3.82                            | 0.93                            | 0.73                            |
| $\Delta\nu_3(\text{theory})^a$  | 5.1                             | 3.4                             |                                 |                                 |
| $\Delta\nu_3(\text{MI, N}_2)$   | 4.9 (HHM)                       | 3.2 (HHM)                       |                                 |                                 |
|                                 | 5.0 (DWR)                       | 3.4 (DWR)                       |                                 |                                 |

<sup>a</sup>The values of  $\Delta\nu_3(\text{theory})$  were obtained by scaling  $\Delta\omega_3(\text{theory})$  for a nitrogen matrix effect with the formula  $\Delta\nu_3(\text{theory}) = \Delta\omega_3(\text{theory}) \times \nu_3(\text{MI, N}_2) / \nu_3(\text{theory})$  using the  $\nu_3(\text{MI, N}_2)$  values reported by HHM and DWR for  $\text{EuCl}_2$

**Table S5** 4c-AoC-SCF calculated second-order spin-orbit splittings,  $\text{cm}^{-1}$ , in the electronic ground states of  $\text{EuX}_2$

| Level (degeneracy) | $\text{EuF}_2$ | $\text{EuCl}_2$ | $\text{EuBr}_2$ | $\text{EuI}_2$ |
|--------------------|----------------|-----------------|-----------------|----------------|
| 1 (2)              | 0.0            | 0.0             | 0.0             | 0.0            |
| 2 (2)              | 3.4            | 2.5             | 3.2             | 4.5            |
| 3 (2)              | 5.7            | 4.2             | 5.4             | 7.5            |
| 4 (2)              | 6.9            | 5.0             | 6.6             | 9.2            |

**Table S6** 4c-AoC-SCF calculated second-order spin-orbit splittings,  $\text{cm}^{-1}$ , in the electronic ground states of  $\text{EuX}$

| Level (degeneracy) | $\text{EuF}$ | $\text{EuCl}$ | $\text{EuBr}$ | $\text{EuI}$ |
|--------------------|--------------|---------------|---------------|--------------|
| 1 (1)              | 0.00         | 0.00          | 0.00          | 0.00         |
| 2 (2)              | 0.12         | 0.09          | 0.01          | 0.04         |
| 3 (2)              | 0.48         | 0.37          | 0.06          | 0.17         |
| 4 (2)              | 1.05         | 0.83          | 0.13          | 0.39         |
| 5 (2)              | 1.79         | 1.44          | 0.23          | 0.70         |

**Table S7** CCSD(T)/CBS calculated force constants of  $\text{EuX}$  and  $\text{EuX}_2$  in natural coordinates. Units are  $\text{mdyn}\cdot\text{\AA}^{-1}$  for  $f_r$  and  $f_{rr}$ ,  $\text{mdyn}\cdot\text{\AA}$  for  $f_{ra}$ , and  $\text{mdyn}$  for  $f_{aa}$

| X  | $\text{EuX}$ | $\text{EuX}_2$ |          |          |          |
|----|--------------|----------------|----------|----------|----------|
|    | $f_r$        | $f_r$          | $f_{rr}$ | $f_{ra}$ | $f_{aa}$ |
| F  | 2.4564       | 2.2550         | 0.1945   | -0.2815  | 0.8835   |
| Cl | 1.4009       | 1.4034         | 0.1082   | -0.1682  | 0.4298   |
| Br | 1.1973       | 1.2257         | 0.0902   | -0.1406  | 0.3330   |
| I  | 0.9573       | 0.9951         | 0.0741   | -0.1025  | 0.2071   |

**Table S8** Thermal functions for gaseous  $\text{EuF}_2$ 

| T      | $C_p$  | S      | $\Phi$ | G      | H(T)–H(0) |
|--------|--------|--------|--------|--------|-----------|
| 298.15 | 12.495 | 74.224 | 63.726 | 74.224 | 3129.978  |
| 300    | 12.509 | 74.301 | 63.791 | 74.224 | 3153.107  |
| 400    | 13.039 | 77.981 | 66.897 | 74.722 | 4433.420  |
| 500    | 13.325 | 80.924 | 69.418 | 75.678 | 5753.008  |
| 600    | 13.493 | 83.370 | 71.545 | 76.762 | 7094.600  |
| 700    | 13.598 | 85.458 | 73.387 | 77.859 | 8449.546  |
| 800    | 13.669 | 87.279 | 75.012 | 78.925 | 9813.140  |
| 900    | 13.718 | 88.892 | 76.467 | 79.944 | 11182.634 |
| 1000   | 13.754 | 90.339 | 77.783 | 80.913 | 12556.323 |
| 1100   | 13.780 | 91.651 | 78.985 | 81.830 | 13933.096 |
| 1200   | 13.801 | 92.851 | 80.091 | 82.699 | 15312.201 |
| 1300   | 13.817 | 93.957 | 81.116 | 83.523 | 16693.112 |
| 1400   | 13.829 | 94.981 | 82.070 | 84.306 | 18075.449 |
| 1500   | 13.840 | 95.936 | 82.963 | 85.050 | 19458.930 |
| 1600   | 13.848 | 96.829 | 83.802 | 85.758 | 20843.343 |

**Table S9** Thermal functions for gaseous  $\text{EuCl}_2$ 

| T      | $C_p$  | S       | $\Phi$ | G      | H(T)–H(0) |
|--------|--------|---------|--------|--------|-----------|
| 298.15 | 13.315 | 80.432  | 68.882 | 80.432 | 3443.669  |
| 300    | 13.322 | 80.514  | 68.953 | 80.432 | 3468.308  |
| 400    | 13.566 | 84.385  | 72.349 | 80.958 | 4814.271  |
| 500    | 13.686 | 87.426  | 75.071 | 81.959 | 6177.467  |
| 600    | 13.753 | 89.928  | 77.345 | 83.085 | 7549.669  |
| 700    | 13.794 | 92.051  | 79.298 | 84.218 | 8927.136  |
| 800    | 13.821 | 93.895  | 81.010 | 85.315 | 10307.938 |
| 900    | 13.839 | 95.524  | 82.534 | 86.360 | 11690.983 |
| 1000   | 13.853 | 96.983  | 83.907 | 87.351 | 13075.607 |
| 1100   | 13.862 | 98.303  | 85.157 | 88.287 | 14461.384 |
| 1200   | 13.870 | 99.510  | 86.303 | 89.173 | 15848.029 |
| 1300   | 13.876 | 100.620 | 87.363 | 90.011 | 17235.343 |
| 1400   | 13.881 | 101.649 | 88.347 | 90.806 | 18623.183 |
| 1500   | 13.884 | 102.607 | 89.266 | 91.562 | 20011.444 |
| 1600   | 13.888 | 103.503 | 90.128 | 92.280 | 21400.049 |

**Table S10** Thermal functions for gaseous  $\text{EuBr}_2$ 

| T      | $C_p$  | S       | $\Phi$ | G      | H(T)–H(0) |
|--------|--------|---------|--------|--------|-----------|
| 298.15 | 13.614 | 85.974  | 73.804 | 85.974 | 3628.499  |
| 300    | 13.618 | 86.058  | 73.879 | 85.974 | 3653.688  |
| 400    | 13.742 | 89.995  | 77.439 | 86.510 | 5022.532  |
| 500    | 13.802 | 93.069  | 80.269 | 87.526 | 6400.054  |
| 600    | 13.834 | 95.589  | 82.619 | 88.666 | 7782.010  |
| 700    | 13.854 | 97.723  | 84.628 | 89.811 | 9166.529  |
| 800    | 13.867 | 99.574  | 86.383 | 90.918 | 10552.660 |
| 900    | 13.876 | 101.208 | 87.941 | 91.973 | 11939.870 |
| 1000   | 13.883 | 102.670 | 89.342 | 92.971 | 13327.838 |
| 1100   | 13.887 | 103.993 | 90.615 | 93.913 | 14716.358 |
| 1200   | 13.891 | 105.202 | 91.781 | 94.805 | 16105.293 |
| 1300   | 13.894 | 106.314 | 92.856 | 95.648 | 17494.547 |
| 1400   | 13.896 | 107.344 | 93.855 | 96.447 | 18884.053 |
| 1500   | 13.898 | 108.302 | 94.787 | 97.206 | 20273.759 |
| 1600   | 13.899 | 109.199 | 95.660 | 97.927 | 21663.629 |

**Table S11** Thermal functions for gaseous  $\text{EuI}_2$ 

| T      | $C_p$  | S       | $\Phi$ | G       | H(T)–H(0) |
|--------|--------|---------|--------|---------|-----------|
| 298.15 | 13.729 | 89.963  | 77.430 | 89.963  | 3736.790  |
| 300    | 13.731 | 90.048  | 77.508 | 89.964  | 3762.191  |
| 400    | 13.808 | 94.011  | 81.161 | 90.503  | 5139.694  |
| 500    | 13.845 | 97.096  | 84.051 | 91.525  | 6522.528  |
| 600    | 13.864 | 99.622  | 86.442 | 92.670  | 7908.065  |
| 700    | 13.876 | 101.760 | 88.482 | 93.820  | 9295.158  |
| 800    | 13.884 | 103.614 | 90.260 | 94.931  | 10683.226 |
| 900    | 13.890 | 105.250 | 91.836 | 95.988  | 12071.947 |
| 1000   | 13.894 | 106.713 | 93.252 | 96.989  | 13461.126 |
| 1100   | 13.896 | 108.038 | 94.537 | 97.934  | 14850.639 |
| 1200   | 13.899 | 109.247 | 95.713 | 98.827  | 16240.401 |
| 1300   | 13.900 | 110.359 | 96.798 | 99.672  | 17630.356 |
| 1400   | 13.902 | 111.390 | 97.804 | 100.473 | 19020.462 |
| 1500   | 13.903 | 112.349 | 98.742 | 101.233 | 20410.689 |
| 1600   | 13.904 | 113.246 | 99.620 | 101.956 | 21801.015 |

**Table S12** Thermal functions for gaseous EuF

| T      | C <sub>p</sub> | S      | Φ      | G      | H(T)–H(0) |
|--------|----------------|--------|--------|--------|-----------|
| 298.15 | 8.212          | 61.843 | 54.411 | 61.843 | 2215.820  |
| 300    | 8.219          | 61.894 | 54.457 | 61.843 | 2231.019  |
| 400    | 8.488          | 64.299 | 56.630 | 62.169 | 3067.817  |
| 500    | 8.636          | 66.211 | 58.361 | 62.793 | 3924.719  |
| 600    | 8.723          | 67.793 | 59.805 | 63.498 | 4793.021  |
| 700    | 8.778          | 69.143 | 61.045 | 64.210 | 5668.285  |
| 800    | 8.815          | 70.317 | 62.132 | 64.902 | 6548.075  |
| 900    | 8.841          | 71.357 | 63.101 | 65.563 | 7430.961  |
| 1000   | 8.860          | 72.290 | 63.974 | 66.189 | 8316.050  |
| 1100   | 8.874          | 73.135 | 64.769 | 66.783 | 9202.762  |
| 1200   | 8.885          | 73.907 | 65.498 | 67.345 | 10090.702 |
| 1300   | 8.893          | 74.619 | 66.173 | 67.878 | 10979.593 |
| 1400   | 8.900          | 75.278 | 66.800 | 68.383 | 11869.236 |
| 1500   | 8.905          | 75.892 | 67.386 | 68.863 | 12759.481 |
| 1600   | 8.910          | 76.467 | 67.936 | 69.321 | 13650.220 |

**Table S13** Thermal functions for gaseous EuCl

| T      | C <sub>p</sub> | S      | Φ      | G      | H(T)–H(0) |
|--------|----------------|--------|--------|--------|-----------|
| 298.15 | 8.649          | 64.831 | 56.963 | 64.831 | 2346.044  |
| 300    | 8.652          | 64.885 | 57.011 | 64.831 | 2362.048  |
| 400    | 8.773          | 67.393 | 59.307 | 65.173 | 3234.079  |
| 500    | 8.832          | 69.357 | 61.128 | 65.820 | 4114.596  |
| 600    | 8.865          | 70.971 | 62.638 | 66.548 | 4999.548  |
| 700    | 8.885          | 72.339 | 63.929 | 67.280 | 5887.095  |
| 800    | 8.898          | 73.526 | 65.056 | 67.988 | 6776.286  |
| 900    | 8.907          | 74.575 | 66.056 | 68.663 | 7666.581  |
| 1000   | 8.914          | 75.513 | 66.956 | 69.302 | 8557.655  |
| 1100   | 8.919          | 76.363 | 67.773 | 69.906 | 9449.297  |
| 1200   | 8.922          | 77.140 | 68.522 | 70.477 | 10341.367 |
| 1300   | 8.925          | 77.854 | 69.212 | 71.017 | 11233.767 |
| 1400   | 8.928          | 78.515 | 69.854 | 71.529 | 12126.426 |
| 1500   | 8.930          | 79.131 | 70.452 | 72.016 | 13019.293 |
| 1600   | 8.931          | 79.708 | 71.013 | 72.479 | 13912.329 |

**Table S14** Thermal functions for gaseous EuBr

| T      | C <sub>p</sub> | S      | Φ      | G      | H(T)–H(0) |
|--------|----------------|--------|--------|--------|-----------|
| 298.15 | 8.798          | 67.562 | 59.419 | 67.562 | 2427.879  |
| 300    | 8.800          | 67.616 | 59.469 | 67.562 | 2444.157  |
| 400    | 8.861          | 70.158 | 61.839 | 67.908 | 3327.603  |
| 500    | 8.890          | 72.138 | 63.708 | 68.563 | 4215.271  |
| 600    | 8.905          | 73.760 | 65.252 | 69.298 | 5105.094  |
| 700    | 8.915          | 75.134 | 66.568 | 70.036 | 5996.162  |
| 800    | 8.921          | 76.325 | 67.715 | 70.750 | 6888.014  |
| 900    | 8.926          | 77.376 | 68.731 | 71.429 | 7780.390  |
| 1000   | 8.929          | 78.317 | 69.643 | 72.071 | 8673.134  |
| 1100   | 8.931          | 79.168 | 70.471 | 72.678 | 9566.147  |
| 1200   | 8.933          | 79.945 | 71.229 | 73.252 | 10459.360 |
| 1300   | 8.934          | 80.660 | 71.927 | 73.795 | 11352.729 |
| 1400   | 8.935          | 81.322 | 72.575 | 74.309 | 12246.220 |
| 1500   | 8.936          | 81.939 | 73.179 | 74.797 | 13139.809 |
| 1600   | 8.937          | 82.515 | 73.744 | 75.262 | 14033.477 |

**Table S15** Thermal functions for gaseous EuI

| T      | C <sub>p</sub> | S      | Φ      | G      | H(T)–H(0) |
|--------|----------------|--------|--------|--------|-----------|
| 298.15 | 8.854          | 69.474 | 61.177 | 69.474 | 2473.974  |
| 300    | 8.855          | 69.529 | 61.228 | 69.475 | 2490.356  |
| 400    | 8.893          | 72.083 | 63.638 | 69.823 | 3378.021  |
| 500    | 8.910          | 74.069 | 65.533 | 70.481 | 4268.278  |
| 600    | 8.920          | 75.695 | 67.095 | 71.218 | 5159.846  |
| 700    | 8.926          | 77.070 | 68.424 | 71.958 | 6052.168  |
| 800    | 8.930          | 78.262 | 69.581 | 72.674 | 6944.964  |
| 900    | 8.932          | 79.314 | 70.605 | 73.354 | 7838.077  |
| 1000   | 8.934          | 80.255 | 71.524 | 73.998 | 8731.411  |
| 1100   | 8.936          | 81.107 | 72.357 | 74.606 | 9624.907  |
| 1200   | 8.937          | 81.885 | 73.119 | 75.181 | 10518.524 |
| 1300   | 8.937          | 82.600 | 73.821 | 75.724 | 11412.234 |
| 1400   | 8.938          | 83.262 | 74.472 | 76.239 | 12306.018 |
| 1500   | 8.939          | 83.879 | 75.079 | 76.728 | 13199.861 |
| 1600   | 8.939          | 84.456 | 75.647 | 77.194 | 14093.751 |

**Table S16** Bond lengths  $r_e$ , Å, bond angles  $\alpha_e$ , deg., barriers to linearity  $h$ , cm<sup>-1</sup>, bond length differences between the linear and bent geometries  $\Delta r_b$ , Å, harmonic vibrational frequencies  $\omega_i$ , cm<sup>-1</sup>, and total atomization energies TAE, kcal·mol<sup>-1</sup>, of the europium dihalides EuX<sub>2</sub> (X = F, Cl, Br, I)

|                         |         | $r_e$ | $\alpha_e$ | $h$  | $\Delta r_b$ | $\omega_1$ | $\omega_2$ | $\omega_3$ | TAE |
|-------------------------|---------|-------|------------|------|--------------|------------|------------|------------|-----|
| <i>EuF<sub>2</sub></i>  |         |       |            |      |              |            |            |            |     |
| MP2                     | LPP     | 2.148 | 126.0      | 1181 | 0.046        | 462        | 89         | 440        | 274 |
|                         | LPP+CPP | 2.132 | 124.5      | 1307 | 0.047        | 474        | 86         | 451        | 277 |
|                         | SPP     | 2.118 | 117.9      | 2023 | 0.060        | 481        | 102        | 458        | 275 |
|                         | TZ      | 2.118 | 116.9      | 2136 | 0.062        | 481        | 102        | 459        | 275 |
| CCSD(T)                 | LPP     | 2.149 | 126.2      | 1154 | 0.045        | 463        | 89         | 442        | 258 |
|                         | LPP+CPP | 2.134 | 124.8      | 1267 | 0.045        | 472        | 91         | 449        | 258 |
|                         | SPP     | 2.126 | 118.9      | 1882 | 0.057        | 479        | 99         | 458        | 259 |
|                         | TZ      | 2.126 | 118.5      | 1969 | 0.058        | 479        | 100        | 458        | 259 |
| <i>EuCl<sub>2</sub></i> |         |       |            |      |              |            |            |            |     |
| MP2                     | LPP     | 2.638 | 139.9      | 240  | 0.024        | 272        | 37         | 283        | 210 |
|                         | LPP+CPP | 2.625 | 138.5      | 270  | 0.025        | 279        | 33         | 290        | 211 |
|                         | SPP     | 2.586 | 130.7      | 547  | 0.035        | 285        | 45         | 296        | 212 |
|                         | TZ      | 2.587 | 129.6      | 639  | 0.037        | 285        | 46         | 295        | 211 |
| CCSD(T)                 | LPP     | 2.650 | 141.3      | 207  | 0.022        | 268        | 36         | 280        | 202 |
|                         | LPP+CPP | 2.631 | 139.2      | 254  | 0.024        | 273        | 38         | 284        | 201 |
|                         | SPP     | 2.607 | 133.3      | 446  | 0.031        | 280        | 42         | 291        | 204 |
|                         | TZ      | 2.608 | 131.7      | 521  | 0.033        | 279        | 44         | 290        | 203 |
| <i>EuBr<sub>2</sub></i> |         |       |            |      |              |            |            |            |     |
| MP2                     | LPP     | 2.794 | 145.4      | 124  | 0.017        | 172        | 22         | 207        | 180 |
|                         | LPP+CPP | 2.782 | 144.3      | 138  | 0.018        | 177        | 19         | 212        | 180 |
|                         | SPP/LPP | 2.737 | 133.9      | 344  | 0.030        | 184        | 28         | 215        | 182 |
|                         | SPP/SPP | 2.729 | 134.7      | 367  | 0.028        | 184        | 28         | 216        | 184 |
|                         | TZ      | 2.729 | 132.6      | 452  | 0.032        | 186        | 31         | 216        | 184 |
| CCSD(T)                 | LPP     | 2.809 | 147.5      | 99   | 0.015        | 169        | 21         | 205        | 174 |
|                         | LPP+CPP | 2.790 | 145.1      | 127  | 0.017        | 173        | 22         | 207        | 173 |
|                         | SPP/LPP | 2.761 | 137.3      | 263  | 0.025        | 178        | 26         | 211        | 176 |
|                         | SPP/SPP | 2.754 | 137.2      | 274  | 0.025        | 179        | 26         | 212        | 177 |
|                         | TZ      | 2.757 | 135.3      | 343  | 0.027        | 180        | 28         | 212        | 177 |
| <i>EuI<sub>2</sub></i>  |         |       |            |      |              |            |            |            |     |
| MP2                     | LPP     | 3.033 | 156.0      | 26   | 0.008        | 122        | 13         | 172        | 145 |
|                         | LPP+CPP | 3.023 | 154.9      | 30   | 0.008        | 125        | 9          | 175        | 145 |
|                         | SPP/LPP | 2.966 | 140.4      | 139  | 0.021        | 134        | 18         | 178        | 147 |
|                         | SPP/SPP | 2.949 | 141.1      | 177  | 0.020        | 134        | 18         | 179        | 150 |
|                         | TZ      | 2.948 | 136.9      | 255  | 0.025        | 127        | 32         | 183        | 150 |
| CCSD(T)                 | LPP     | 3.050 | 159.2      | 15   | 0.006        | 119        | 12         | 170        | 139 |
|                         | LPP+CPP | 3.030 | 156.0      | 26   | 0.008        | 122        | 13         | 172        | 138 |
|                         | SPP/LPP | 2.993 | 145.9      | 90   | 0.015        | 128        | 16         | 174        | 141 |
|                         | SPP/SPP | 2.980 | 144.5      | 108  | 0.016        | 129        | 17         | 175        | 143 |
|                         | TZ      | 2.982 | 141.4      | 168  | 0.020        | 131        | 19         | 173        | 143 |



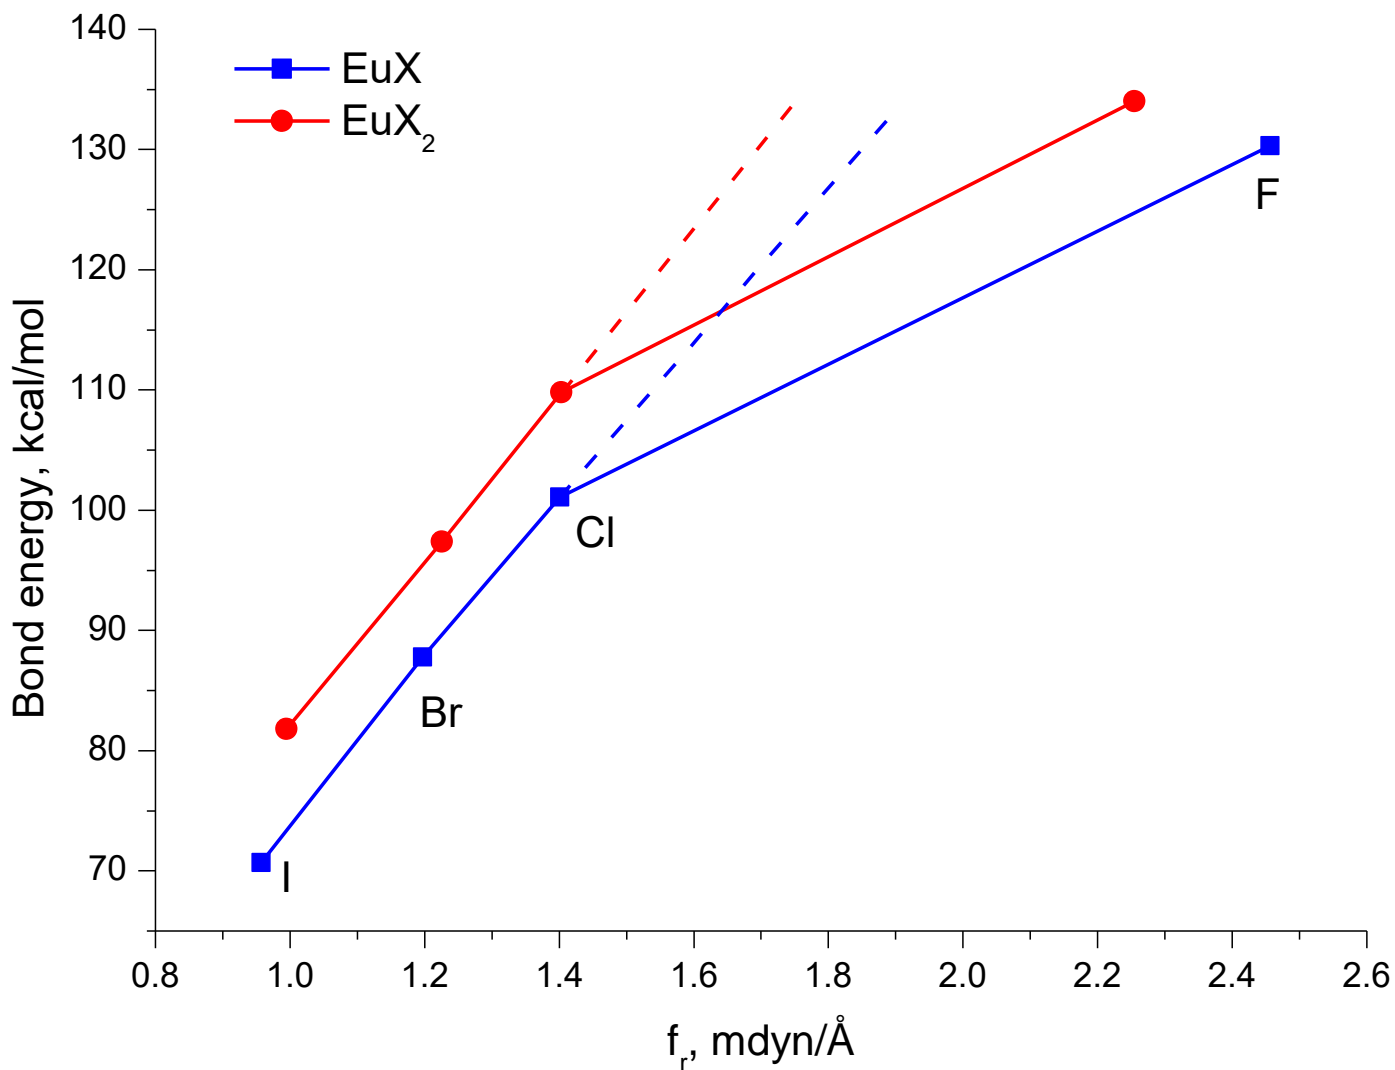

**Fig. S1** Bond dissociation ( $\text{EuX} \rightarrow \text{Eu} + \text{X}$ ) and bond cleavage ( $\text{EuX}_2 \rightarrow \text{EuX} + \text{X}$ ) energies vs. bond-stretching force constants in  $\text{EuX}$  and  $\text{EuX}_2$
